# Supplementary material for: Comparative analysis of Chinese large language model performance on atrial fibrillation questions
Source: Research Square preprint supplement (doi:10.21203/rs.3.rs-6673302/v1), 2025-06-17
Supplement: Supplementary file 1 [file a0f74b16c99279eb936030b6.docx]

| 1. What is atrial fibrillation?   Question list |
| --- |
| 1. I have been having palpitations recently, is it atrial fibrillation? |
| 1. How to diagnose atrial fibrillation? |
| 1. I've got atrial fibrillation, which department should I head to see a doctor? |
| 5. What are the causes of atrial fibrillation? |
| 6. Can atrial fibrillation be fatal? |
| 7. What are the risks of atrial fibrillation? |
| 8. Can atrial fibrillation cause a stroke? |
| 9. Can atrial fibrillation be cured? |
| 10.What is the difference between paroxysmal atrial fibrillation and persistent atrial fibrillation? |
| 11.What should I pay attention to in diet if I have atrial fibrillation? |
| 12. Should I quit smoking and drinking if I have atrial fibrillation? |
| 13.Is it permissible to consume tea or coffee if I have atrial fibrillation? |
| 14. Is it safe for me to engage in physical exercise while having atrial fibrillation? |
| 15. What medication should I take for acute attack of atrial fibrillation? |
| 16. What is the current best treatment for atrial fibrillation? |
| 17. What medications are used to treat atrial fibrillation? |
| 18. What are the side effects of amiodarone? |
| 19. Do I have to take anticoagulant drugs for atrial fibrillation? What are the potential side effects of anticoagulant drugs? |
| 20. What is the difference between warfarin and rivaroxaban, edoxaban and dabigatran? |
| 21. I have atrial fibrillation with moderate to severe mitral stenosis. What anticoagulant drugs can I take? |
| 22. I am currently taking rivaroxaban and preparing for a gastrointestinal endoscopy. How long do I need to stop taking rivaroxaban before the examination? |
| 23. Is catheter ablation necessary for patients with atrial fibrillation? |
| 24. Is there a potential for complications arising from catheter ablation in the treatment of atrial fibrillation? |
| 25. Can atrial fibrillation recur following catheter ablation? |
| 26. Is radiofrequency ablation or cryoablation more suitable for the treatment of my atrial fibrillation? |
| 27. Which is better, surgical catheter ablation of atrial fibrillation or medical catheter ablation? |
| 28. Do I need to continue taking medicine after catheter ablation of atrial fibrillation? |
| 29. What should I do if my atrial fibrillation recurs after catheter ablation? |
| 30. Atrial fibrillation recurred after catheter ablation, am I doing it in vain? |
| 31. I have already undergone one atrial fibrillation catheter ablation procedure, but the AF recurred. Should I go for a second ablation? . |
| 32. What type of patients require left atrial appendage occlusion? |
| 33.Can left atrial appendage occlusion treat atrial fibrillation? |

Questions and expert standard answers in Chinese

1、什么是房颤？

房颤是一种常见的心律失常，是指规则有序的心房电活动丧失，代之以快速无序的颤动波，是严重的心房电活动紊乱。心房无序的颤动即失去了有效的收缩及舒张，心房泵血功能恶化或丧失，加之房室结对快速心房激动的递减传导，引起心室极不规则的反应。

2、我最近有心慌，是房颤吗？

很多心律失常均可引起心悸，并不一定是房颤。建议心慌时完善心电图检查以明确。

1. 怎么诊断房颤？

单导联心电图（≥30 s）或 12 导联心电图显示 P 波消失，代之以大小、形态及时限均不

规则的颤动波（f波）、RR间期绝对不规则即可诊断为房颤

1. 我得了房颤，该去看哪个科？

心血管内科。

5、 房颤的病因有哪些？（病因方面）

包括年龄增加、原发疾病［包括心血管疾病如高血压、瓣膜性心脏病、冠心病、先天性心脏病、心肌病等，以及非心血管疾病，如内分泌疾病（如甲状腺功能亢进）、呼吸系统

疾病（如睡眠呼吸暂停综合征、慢性阻塞性肺疾病等）、自身免疫性疾病、肿瘤等］、不健康生活方式（超重/肥胖、饮酒、吸烟、体力活动过量/不足等）、遗传等。此外，严重疾病状态（如重症感染）及外科手术均会增加房颤发生风险。

6、 房颤会致命吗？（并发症）

房颤通常不会致命。但是当房颤的心率过快或过慢引起血流动力学障碍时可能致命。

另外，房颤引起的血栓栓塞、心衰风险加重是致死、致残的重要原因。

7、 房颤有什么危险？（并发症）

房颤患者的死亡风险是无房颤患者的 1.5~1.9 倍，其机制可能与血栓栓塞、心衰风险增加，以及共患疾病的协同作用有关。未接受抗凝治疗的房颤患者卒中、短暂性脑缺血发作（transient ischemic attack，TIA）及 体 循 环 栓 塞 的 发 生 率 约34.2/1 000 人年，是无房颤人群的 3~5 倍；与非房颤相关性卒中相比，房颤所致卒中往往病情更严重，致残、致死率和复发率均更高。20%~30%的房颤患者合并心衰，可能与房颤伴快心室率、房室收缩不同步、心室应变不同步，以及房颤相关心肌病等有关。房颤患者的痴呆发病率约 4.1%/年，是无房颤人群的 1.5 倍，可能与卒中、颅内出血及大脑低灌注等机制有关［3］。60% 以上的房颤患者有不同程度的症状，16.5%伴有严重或致残性

症状［22‑25］。房颤患者住院率非常高，达到了43.7次/100 人年，心血管住院（26.3 次/100 人年）较非心血管住院（15.7次/100人年）更为常见。

8、得了房颤，会发生脑梗死吗

未接受抗凝治疗的房颤患者卒中、短暂性脑缺血发作（transient ischemic attack，TIA）及 体 循 环 栓 塞 的 发 生 率 约34.2/1 000 人年，是无房颤人群的 3~5 倍；但并非所有的患者均会发生脑梗死。根据患者卒中的风险给予抗凝治疗可降低房颤卒中的风险。。

9、房颤能治愈吗？（预后）

这是因人而异的问题。目前无论药物治疗或导管消融治疗，都具有一定比例的患者会复发。

10、阵发性房颤和持续性房颤有什么区别？（诊断）

阵发性房颤是房颤持续时间小于7天

持续性房颤是指房颤持续时间7天及以上

11、得了房颤，饮食上要注意什么？（一般性治疗）

饮酒是房颤发生的危险因素，即使少量饮酒也会增加房颤发生风险。戒酒可减少房颤发作，降低房颤负荷。饮酒同时增加房颤患者 出血和卒中风险。观察性研究显示，戒酒与导管消融术后房颤复发率下降相关。

吸烟人群房颤发生风险更高，且呈剂量依赖关系，戒烟者的房颤发生风险显著低于目前

吸烟者。建议戒酒。

如合并糖尿病、高血压等，建议低盐糖尿病饮食等。

12、得了房颤，需要戒烟戒酒吗？

饮酒是房颤发生的危险因素，即使少量饮酒也会增加房颤发生风险。戒酒可减少房颤发作，降低房颤负荷。饮酒同时增加房颤患者 出血和卒中风险。观察性研究显示，戒酒与导管消融术后房颤复发率下降相关。

吸烟人群房颤发生风险更高，且呈剂量依赖关系，戒烟者的房颤发生风险显著低于目前

吸烟者。建议戒酒。

13、得了房颤，能喝茶、喝咖啡吗？（房颤宣教）

不需要戒茶叶。甚至有报道绿茶可能会减少房颤的发生。目前的研究并不支持，咖啡会增加房颤发作的风险，不需要戒掉咖啡。

14得了房颤我可以运动吗

运动：运动与房颤发生风险的关系比较复杂，适当强度的运动可预防房颤的发生，但长 期高强度运动的运动员房颤发生风险高。适当 运动（每周≥150 min中等强度或≥75 min高强度）与 房颤患者长期心血管死亡和全因死亡风险下降相关。

15、房颤急性发作时，我该用什么药治疗？

当房颤急性发作时，可以用以下两类药物：

1）控制心室率的药物。口服的有美托洛尔缓释片、比索洛尔、地尔硫卓、维拉帕米、地高辛

2）口袋药物普罗帕酮或氟卡尼。

但是由于患者对医学知识的缺乏，建议医院急诊就诊治疗，在医生指导下用药更为安全，同时静脉用药能更快的控制房颤。

16、房颤目前的最佳治疗方法是什么？（治疗）

因患者不同治疗方式不同。并无最佳的治疗方法。

目前房颤有多种治疗方式。每种治疗方式均有优缺点。

从治疗策略上来讲：

（1）控制心室率：对于持续性房颤患者如患者无法转为窦性心律，可给予美托洛尔缓释片、比索洛尔、地尔硫卓、维拉帕米、地高辛控制心室率

（2）控制心律 ：

药物治疗：可给予Ic类和III类抗心律失常药物控制心律。

房颤消融治疗 在药物控制不佳的情况下，可考虑房颤消融治疗。房颤消融治疗在改善患者生活质量、降低房颤负荷、减少房颤复发方面优于药物治疗。

电复律等治疗。

（3）抗凝治疗。

口服抗凝药物包括华法林和NOACs治疗

左心耳封堵治疗。

对于有抗凝禁忌的房颤患者，或者服用抗凝药物仍发生栓塞事件的患者，可考虑行左心耳封堵术。

17、目前治疗房颤的药物有哪些？

（1）控制心室率：对于持续性房颤患者如患者无法转为窦性心律，可给予美托洛尔缓释片、比索洛尔、地尔硫卓、维拉帕米、地高辛控制心室率

（2）控制心律 ：

药物治疗：可给予Ic类和III类抗心律失常药物控制心律。

（3）抗凝的药物

维生素k抑制剂：以华法林为代表。

NOAC：X因子抑制剂：如利伐沙班、艾多沙班、阿哌沙班

直接凝血酶抑制剂：达比加群。

18、胺碘酮有什么副作用？

严重不良反应：

服用胺碘酮可能引起窦性心动过缓，QT间期延长、心衰也可能。

肺毒性：如间质性肺炎、嗜酸性粒细胞性肺炎、机化性肺炎、急性呼吸窘迫综合征、弥漫性肺泡出血、肺结节或孤立性肺肿物、胸腔积液等。

甲状腺毒性：甲状腺功能减退或亢进，发生率为6%与2%。

肝毒性、视神经病变、致心律失常作用。

轻微不良反应：

恶心、厌食

角膜微沉积

光过敏

皮肤蓝色改变

19、房颤必须要吃抗凝药物吗？抗凝药物有什么副作用

对于房颤合并中重度二尖瓣狭窄、机械瓣置换术后的患者及房颤合并肥厚型心肌病的患者，建议抗凝。

其余的房颤患者根据CHADS2Vas评分进行抗凝治疗。对于评分≥1的男性患者以及评分≥2的女性患者建议抗凝治疗。

抗凝药物最常见的副作用是出血。

20、华法林和艾多沙班、利伐沙班、达比加群有什么不同

它们均属于口服抗凝药物。他们的作用机制不同。具体到患者使用上：对于房颤合并中重度二尖瓣狭窄、机械瓣置换术后的房颤患者推荐使用华法林，而NOAC属于禁用。

对于非瓣膜性房颤患者，如由抗凝适应症，目前推荐首选口服NOAC治疗。

华法林在使用过程中须密切监测INR。而NOAC无需监测血液治疗。它们在预防卒中的功效上相仿或由于华法林， 但在颅内出血并发症方面NOAC优于华法林。

21、我是风湿性中重度二尖瓣狭窄合并房颤，能服用什么抗凝药？

中重度二尖瓣狭窄合并房颤的患者建议口服华法林进行抗凝治疗。目前证实的NOAC在有效性及安全性方面均劣于华法林，所以对于中重度二尖瓣狭窄合并房颤的患者不推荐使用ONAC。

22、我目前正在服用利伐沙班，准备行胃肠镜检查，检查前需停用利伐沙班多久。

建议至少停用3天

23、房颤患者必须要做导管消融吗？

不是必须要做。如患者行房颤导管消融前应排除可纠正的继发因素（如甲状腺功能亢进等）决定房颤导管消融前应评估消融手术风险、复发风险和对患者预后的影响。有症状的房颤患者如 AAD 治疗无效或不能耐受，应行导管消融减少房颤复发，改善症状。对于有症状的阵发性房颤患者，应将导管消融作为一线治疗以改善症状。合并HFrEF的房颤患者，应行导管消融改善预后，合并HFpEF的房颤患者，应考虑行导管消融改善症状。房颤转复后出现有症状的心脏停搏患者，应考虑行导管消融避免置入永久起搏器［256‑258］诊断 1 年内的合并心血管危险因素的房颤患者，包括持续性房颤与无症状房颤，应考虑行导管消融以改善预后。

房颤合并中重度功能性二尖瓣和（或）三尖瓣反流行房颤导管消融。

24、房颤导管消融有风险吗

导管消融：危及生命的并发症：围术期死亡(<0.1%)、左房食管瘘（<0.5%）、围手术期血栓栓塞事件（<1.0%）心包填塞≈1%

严重的并发症 肺静脉狭窄<1.0% 持续的膈神经麻痹<1.0% 血管并发症 2-4% 中小并发症（1-2%），不明意义的并发症（无症状脑栓塞）5-15%

| 25、导管消融治疗后会复发吗 |
| --- |
| 有复发可能。对于持续性和持久性房颤，单纯行PVI成功率较低，单次消融后临床成功率为 57%，多次消融后可提高至 71%。一项研究显示术后5、10、15年，阵发性房颤患者窦性心律维持率 分别为 67.8%、56.3%、47.6%，持续性房颤分别为 46.6%、35.6%、26.5%，持久性房颤分别为 30.4%、 18.0%、3.4%。  26、我适合射频消融还是冷冻消融  在消融能量来源方面，射频消融和冷冻球囊消融在以肺静脉隔离为消融终点的研究中具有相似的安全性及有效性。具体能量的选择取决于就诊医院的情况、术者的喜好、经验、判断，患者的喜好。 |
| 27、外科房颤消融和内科导管消融选哪个更好  在单纯以治疗房颤为目的的外科房颤治疗方面，迷宫Ⅲ型手术治疗持续性房颤的 5年房颤无复发率在 90% 以上，迷宫Ⅳ型手术治疗持续性房颤的 5年窦性心律维持率为 83%~92%。随着房颤外科消融微创技术的成熟，胸腔镜下心外膜消融被越来越多地应用于房颤外科治疗。FAST研究显示，胸腔镜下心外膜消融在维持窦性心律方面优于内科导管消融，但并发症发生风险升高，在亚组分析中，对于阵发性房颤患者，窦性心律维持率胸腔镜下心外膜消融优于导管消融，对于持续性房颤的患者两者间无差异。近期CASA‑AF研究采用置入式循环记录仪记录评价术后的窦性心律维持率，结果显示，持续性房颤患者行胸腔镜下心外膜消融与经皮导管消融术后 12个月的窦性心律维持率无明显差异。对于既往导管消融后复发的房颤患者，RCT 表明，无论是阵发性房颤还是持续性房颤，胸腔镜下心外膜消融在窦性心律维持率方面 均 优 于 导 管 消 融 ，但 严 重 不 良 事 件 发 生 率较高。 |
| 28、导管消融术后还需要继续吃药吗  抗凝药物：术后需要至少服用8周。此后根据CHA2DS2-Vas评分。  抗心律失常药物：  a. 术后继续用抗心律失常6周到3个月可以减少早期房颤的复发、再住院率、避免电复律的发生。临床实际中消融术后AAD的应用是因人而已的。没有可信服的证据证实这种是常规需要的。  b. 接下来，可以根据患者症状、节律状态，AAD可以减弱、停止或继续。近期有证据表明，消融空白期后继续AAD的治疗可以减少抗心律失常的复发。  29、我做了导管消融复发了，该怎么办  术后3个月是空白期，在术后3月内复发的可以观察。术后3个月后可以考虑再次行导管消融。也可以服用药物治疗。  30、术后房颤复发，我是不是白做了？  没有白做。3个月内复发可视情况而定。与抗心律失常药物相比，房颤导管消融可减少房颤的复发，房颤负荷以及患者的生活质量。 |
| 31、我已经做过1次房颤导管消融,术后复发还要做第二次消融吗？  术后3个月是空白期，在术后3月内复发的可以观察。术后3个月后可以考虑再次行导管消融。 |
| 32、什么样的患者需要做左心耳封堵术  有长期抗凝绝对禁忌证的患者，应考虑LAAC  有长期抗凝相对禁忌证的卒中高风险房颤患者，可考虑行LAAC  充分抗凝后仍发生卒中的患者，排除明确脑血管狭窄相关卒中后，可考虑行LAAC |
| 33、左心耳封堵能治疗房颤吗  左心耳封堵的目的是预防房颤的并发症左心耳血栓的形成，并不能减少房颤的发作。 |
