# Supplementary material for: Comparative analysis of Chinese large language model performance on atrial fibrillation questions
Source: Research Square preprint supplement (doi:10.21203/rs.3.rs-6673302/v1), 2025-06-17
Supplement: Supplementary file 2 [file d903726f735198760e896a7c.docx]

ABAB1.0 （developed by MINIMAX）

https://www.minimaxi.com/examination-center/text-experience-center

Baichuan1.0 （developed by Baichun AI）

https://ying.baichuan-ai.com/chat?from=%2Fhome

Chatglm2 （developed by Zhipu AI ）https://open.bigmodel.cn/login?redirect=%2Ftrialcenter

Doubao （developed by Bytedance）

https://www.doubao.com/chat/

Ernie bot 3.5（developed by Baidu）

<https://yiyan.baidu.com/>

Sensechat 3.0 （developed by SenseTime）

https://chat.sensetime.com/

ZiDongTaiChu 2.0 （developed by Institute of Automation，Chinese Academy of Sciences）

https://taichu-web.ia.ac.cn/#/login
